# Supplementary material for: Observational cohort study of clinical outcome in Epstein–Barr virus associated gastric cancer patients
Source: PubMed Central journal article supplement — Ther Adv Med Oncol. 2020 Jul 6;12:1758835920937434. doi: 10.1177/1758835920937434 (PMC7338646; doi:10.1177/1758835920937434), 2020-07-06
Supplement: Supplementary_table_1_3.pdf [file Supplementary_table_1_3.pdf]

Supplementary table 1. Response to therapy for EBVaGC patients

|      | First line therapy,<br>n=31 | Second line therapy,<br>n=12 | Anti-PD1 therapy, n=7 |
|------|-----------------------------|------------------------------|-----------------------|
| CR   | 1 (3.2)                     | 0 (0)                        | 0 (0)                 |
| PR   | 8 (25.8)                    | 3 (25.0)                     | 2 (28.5)              |
| SD   | 19 (61.3)                   | 6 (50.0)                     | 2 (28.5)              |
| PD   | 3 (9.7)                     | 3 (25.0)                     | 3 (43.0)              |
| ORR  | 7 (29.0)                    | 3 (25.0)                     | 2 (28.5)              |
| DCR  | 28 (90.3)                   | 9 (75.0)                     | 4 (57.0)              |
| mPFS | 9.8 months                  | 6.0 months                   | 2.8 months            |

Data were present as n (%) unless specified.

EBVaGC: Epstein-Barr virus associated gastric cancer; PD-1: programmed death 1; CR: complete response; PR: partial response; SD: stable disease; PD: progression disease; ORR: objective response rate; DCR: disease control rate; mPFS: median progression-free survival.
